# Supplementary material
Source: HighWire-hosted journal article supplement (https://bmjopen.bmj.com/content/9/7/e032109)
Supplement: inline-supplementary-material-1 [file inline-supplementary-material-1.pdf]

## Supplementary file 1: Example search strategy

### SCI-Dem search strategy 3.0

#### Databases:

EBSCOhost: **Academic Search Complete, CINAHL, MEDLINE, PsychINFO**

Other health and social care databases: **AMED, Embase, PubMed, Social Care Online**

Interdisciplinary databases: **ProQuest, Scopus**

Other/general: **Google Scholar**

#### Basic search foundation (key terms in research question):

| Key terms      | String of related terms                                                                                                              |
|----------------|--------------------------------------------------------------------------------------------------------------------------------------|
| Dementia       | Dementia                                                                                                                             |
| Community      | Commun* OR Local* OR Social*                                                                                                         |
| Intervention   | Intervention OR Program* OR Project OR Initiative OR Scheme OR Service OR Activit* OR Group OR Club OR Network OR Meeting OR Therapy |
| Sustainability | Sustain* OR Maint* OR Manag* OR Facilitat* OR Barrier*                                                                               |

**AND ONE OF THE FOLLOWING STRINGS** (themes from preliminary programme theory to narrow search):

#### Search 1:

| Key term                      | String of related terms          |
|-------------------------------|----------------------------------|
| Implementation and engagement | Implement* OR Recruit* OR Engag* |

Dementia AND (Commun\* OR Local\* OR Social\*) AND (Intervention OR Program\* OR Project OR Initiative OR Scheme OR Service OR Activit\* OR Group OR Club OR Network OR Meeting OR Therapy) AND (Sustain\* OR Maint\* OR Manag\* OR Facilitat\* OR Barrier\*) AND (Implement\* OR Recruit\* OR Engag\*)

**Search 2:**

| <b>Key term</b>              | <b>String of related terms</b>                                |
|------------------------------|---------------------------------------------------------------|
| <b>Network and marketing</b> | Marketing OR Network* OR Links OR Collaborat* OR Partnership* |

Dementia AND (Commun\* OR Local\* OR Social\*) AND (Intervention OR Program\* OR Project OR Initiative OR Scheme OR Service OR Activit\* OR Group OR Club OR Network OR Meeting OR Therapy) AND (Sustain\* OR Maint\* OR Manag\* OR Facilitat\* OR Barrier\*) AND (Marketing OR Network\* OR Links OR Collaborat\* OR Partnership\*)

**Search 3:**

| <b>Key term</b> | <b>String of related terms</b>                               |
|-----------------|--------------------------------------------------------------|
| <b>Funding</b>  | Fund* OR Grant OR Bid* OR Tender* OR Contract OR Commission* |

Dementia AND (Commun\* OR Local\* OR Social\*) AND (Intervention OR Program\* OR Project OR Initiative OR Scheme OR Service OR Activit\* OR Group OR Club OR Network OR Meeting OR Therapy) AND (Sustain\* OR Maint\* OR Manag\* OR Facilitat\* OR Barrier\*) AND (Fund\* OR Grant OR Bid\* OR Tender\* OR Contract OR Commission\*)

**Search 4:**

| <b>Key term</b>           | <b>String of related terms</b>              |
|---------------------------|---------------------------------------------|
| <b>Stigma and anxiety</b> | Stigma OR Shame OR Fear OR Anxiety OR Worry |

Dementia AND (Commun\* OR Local\* OR Social\*) AND (Intervention OR Program\* OR Project OR Initiative OR Scheme OR Service OR Activit\* OR Group OR Club OR Network OR Meeting OR Therapy) AND (Sustain\* OR Maint\* OR Manag\* OR Facilitat\* OR Barrier\*) AND (Stigma OR Shame OR Fear OR Anxiety OR Worry)
